# Supplementary material
Source: PubMed Central journal article supplement (PMC5089807)

Figure 1.

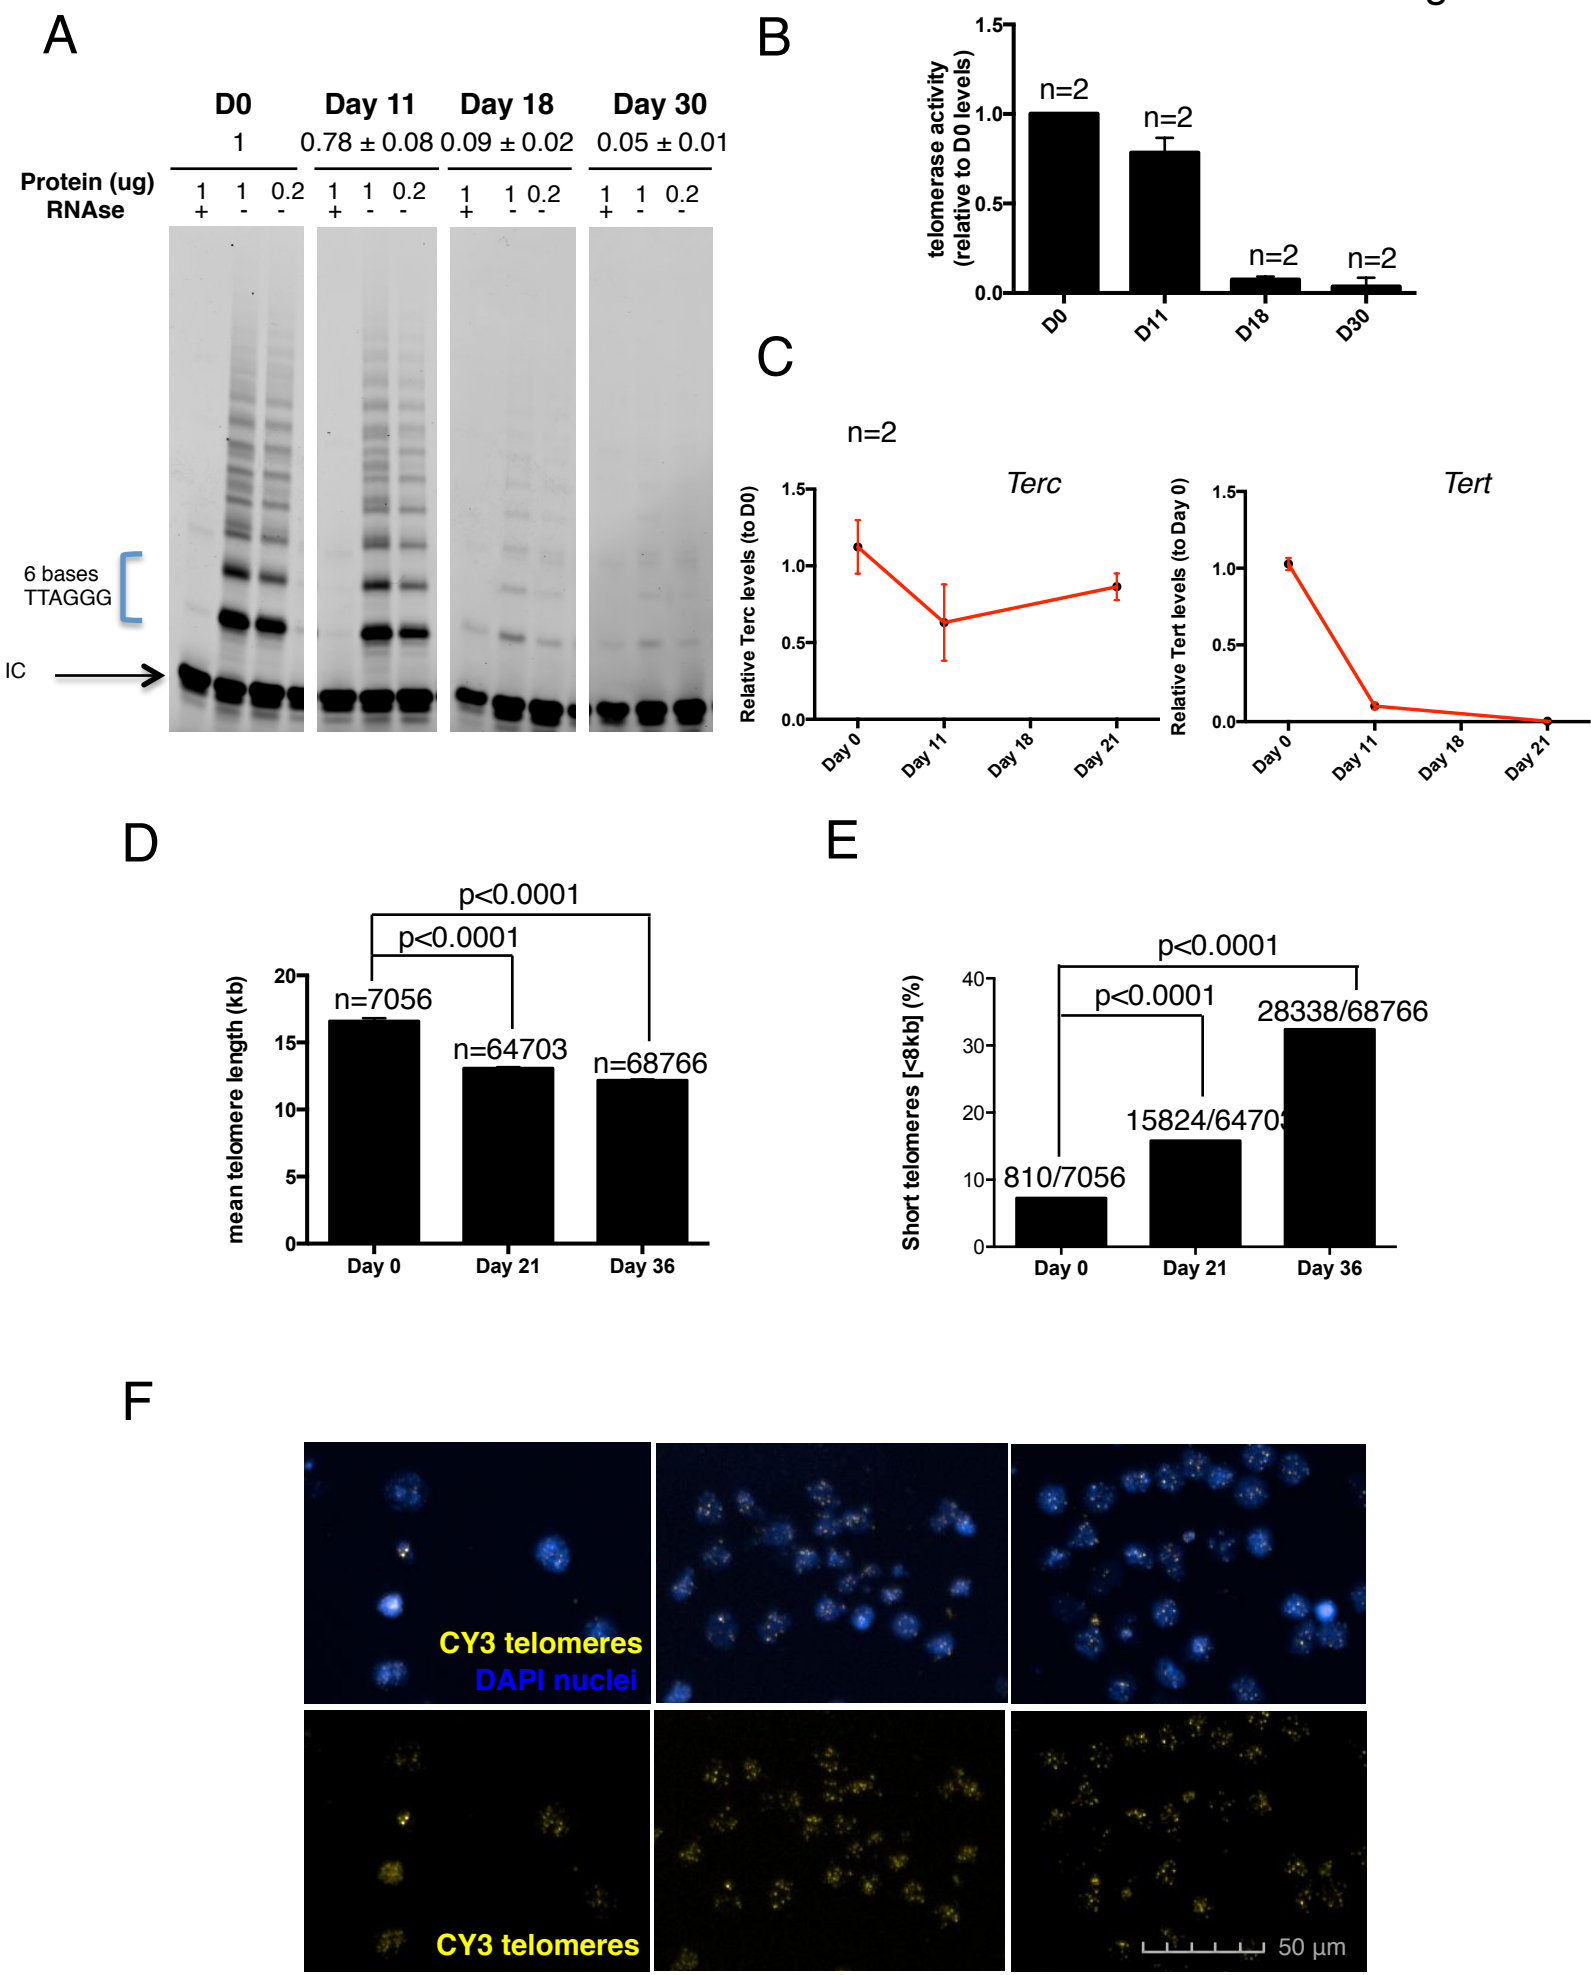

Supplement: NIHMS822121-supplement-3.pdf [file NIHMS822121-supplement-3.pdf]

Figure 2.

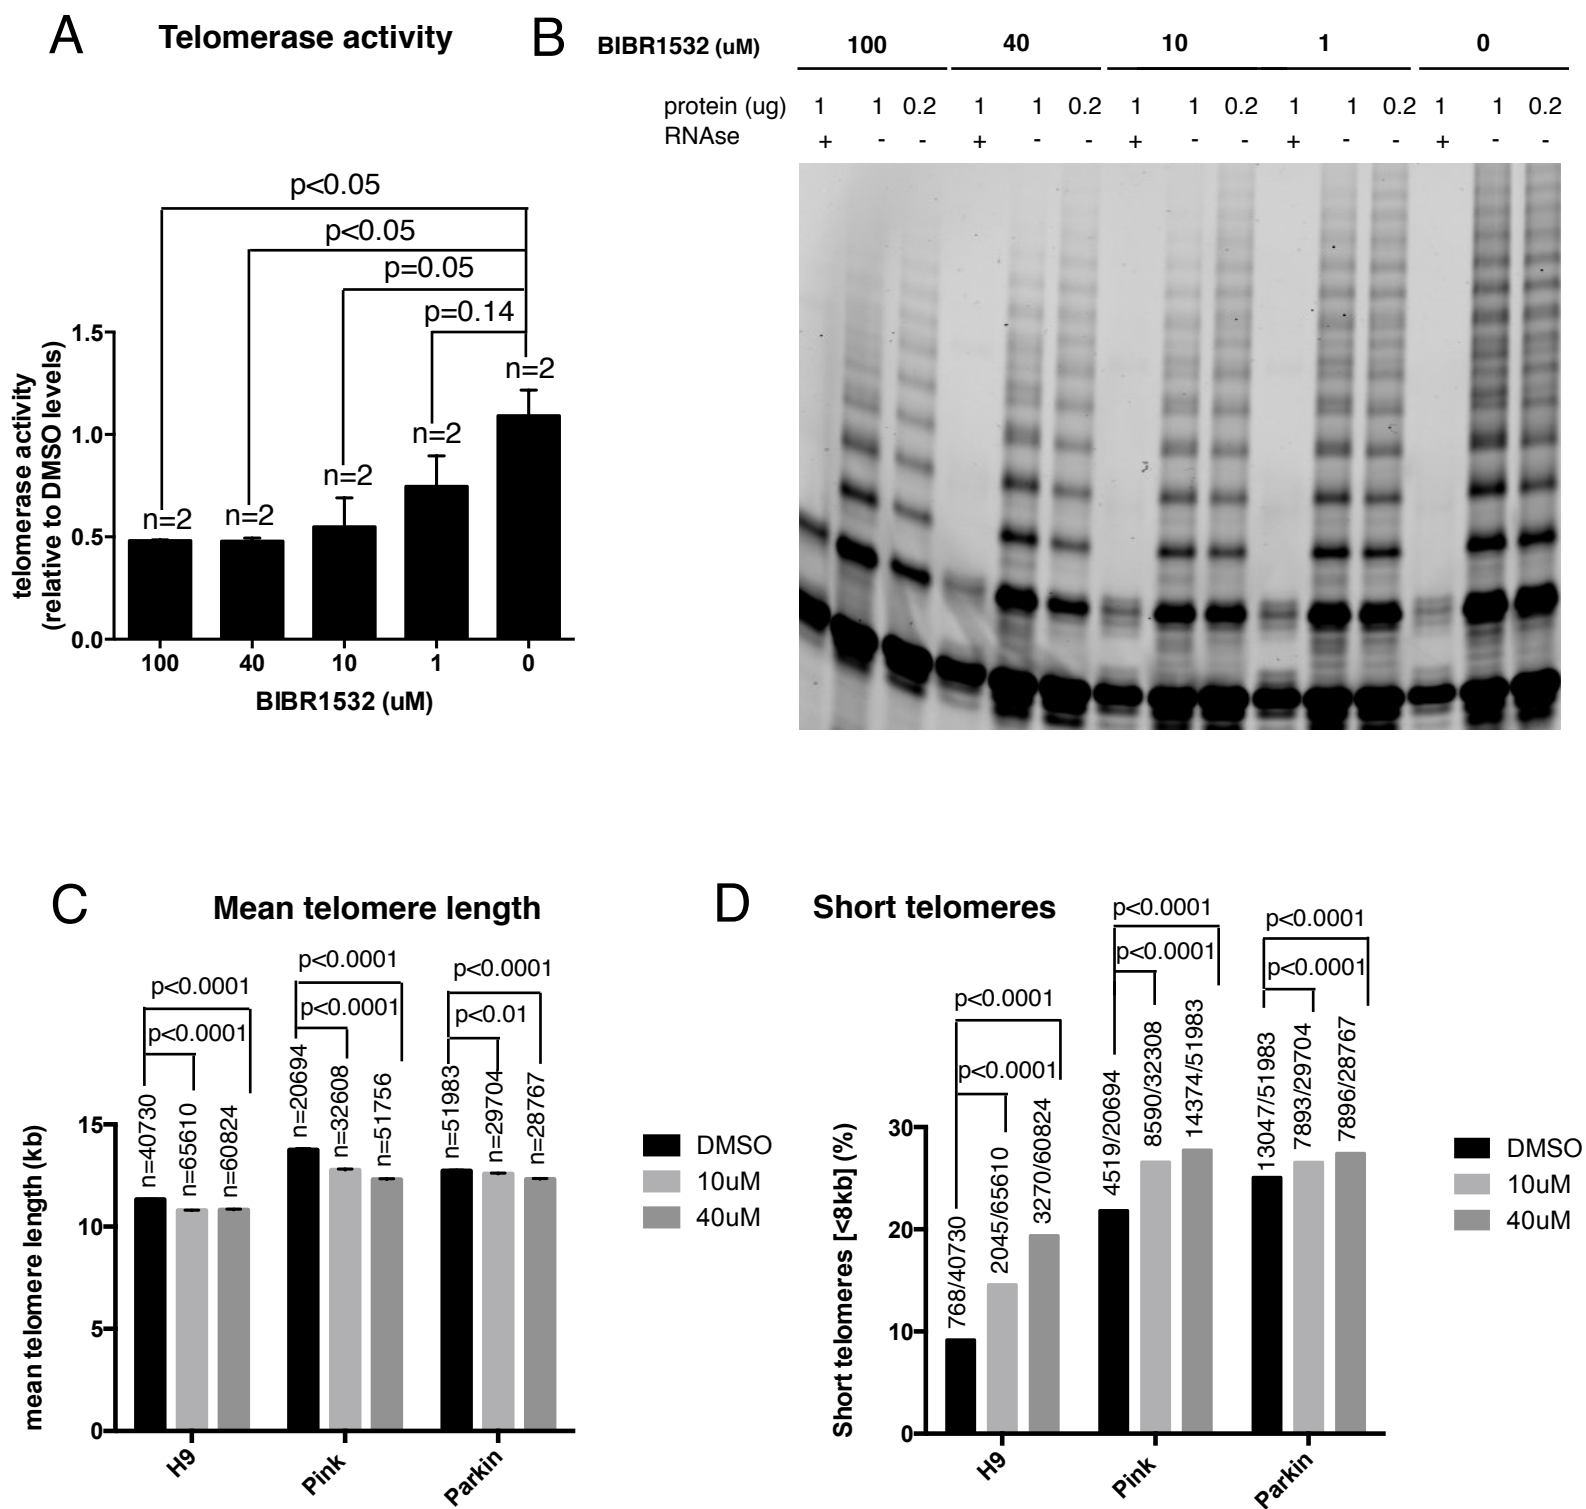

Supplement: NIHMS822121-supplement-4.pdf [file NIHMS822121-supplement-4.pdf]

Day 65

**A**

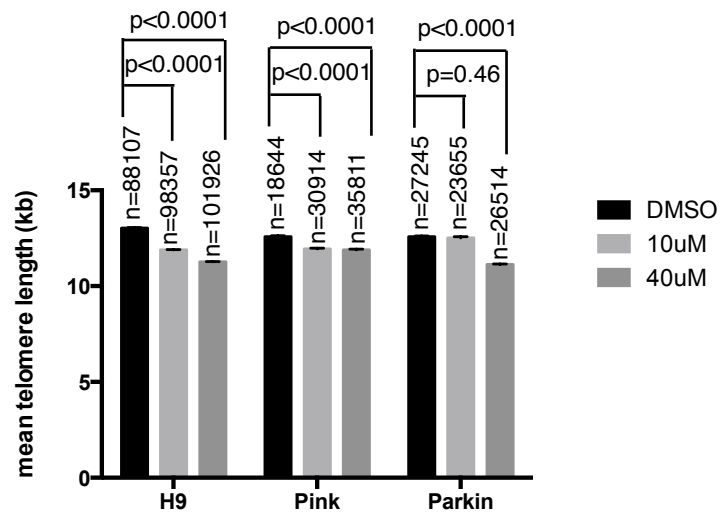

**B**

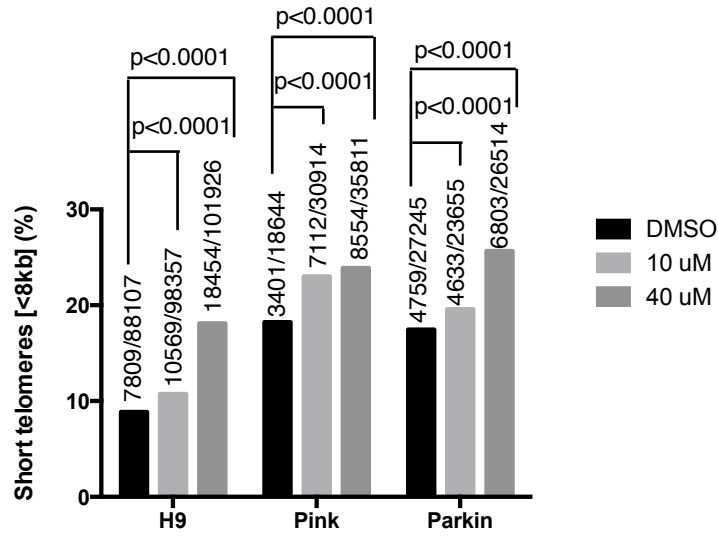

**C**

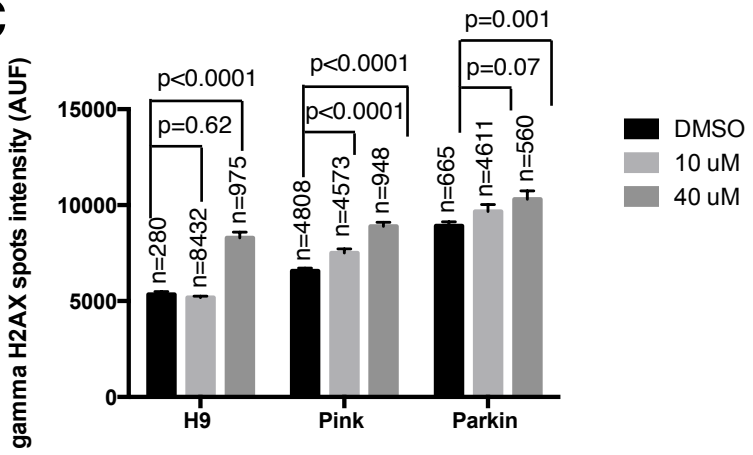

**D**

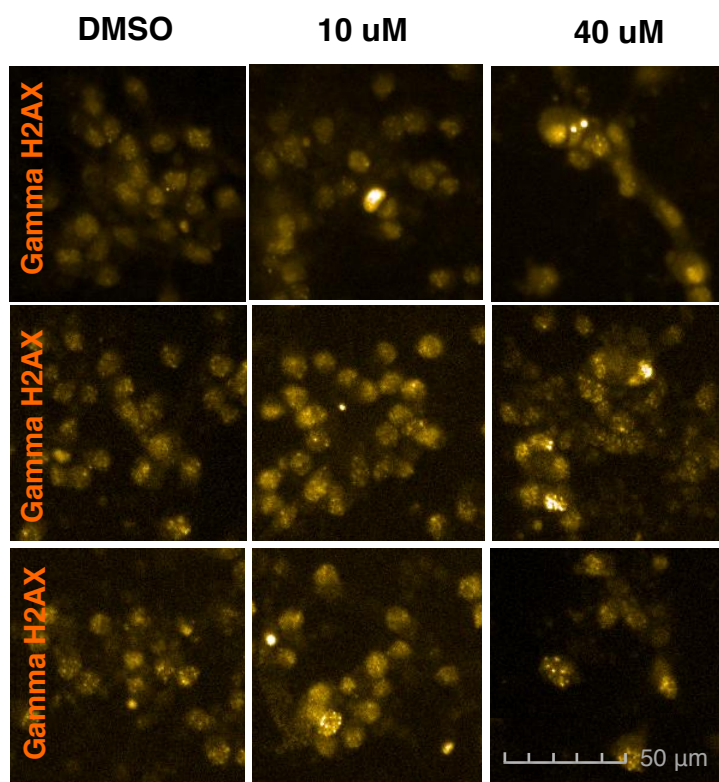

**E**

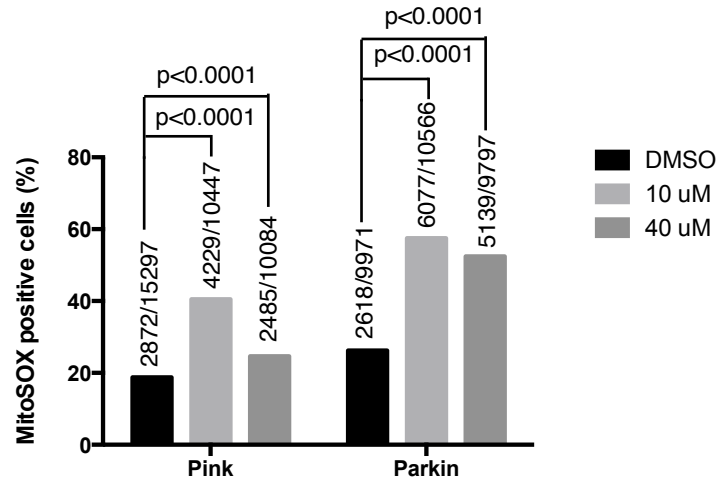

Supplement: NIHMS822121-supplement-5.pdf [file NIHMS822121-supplement-5.pdf]

Day 65

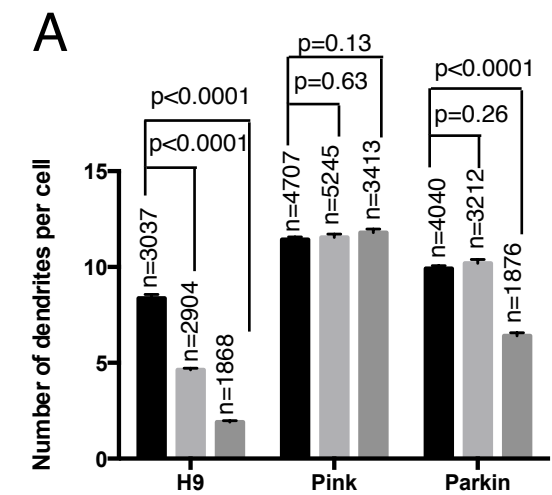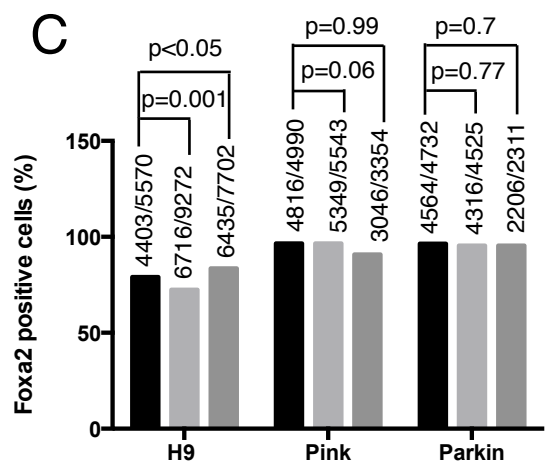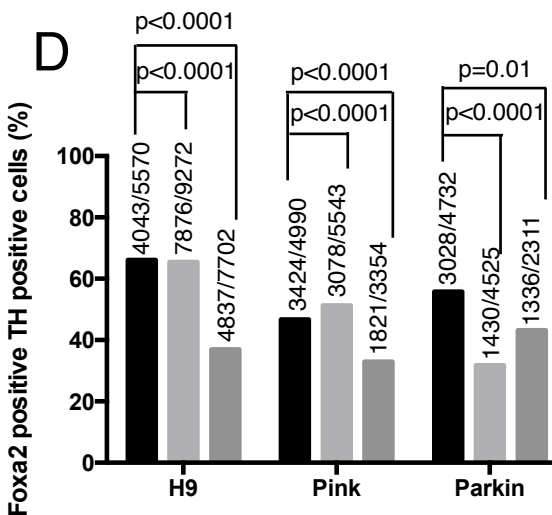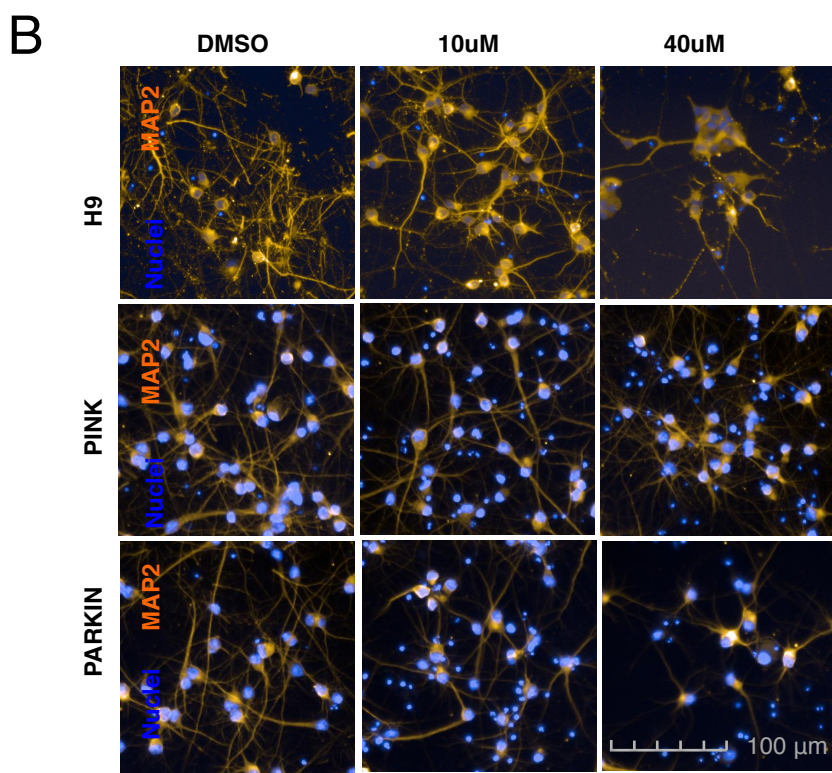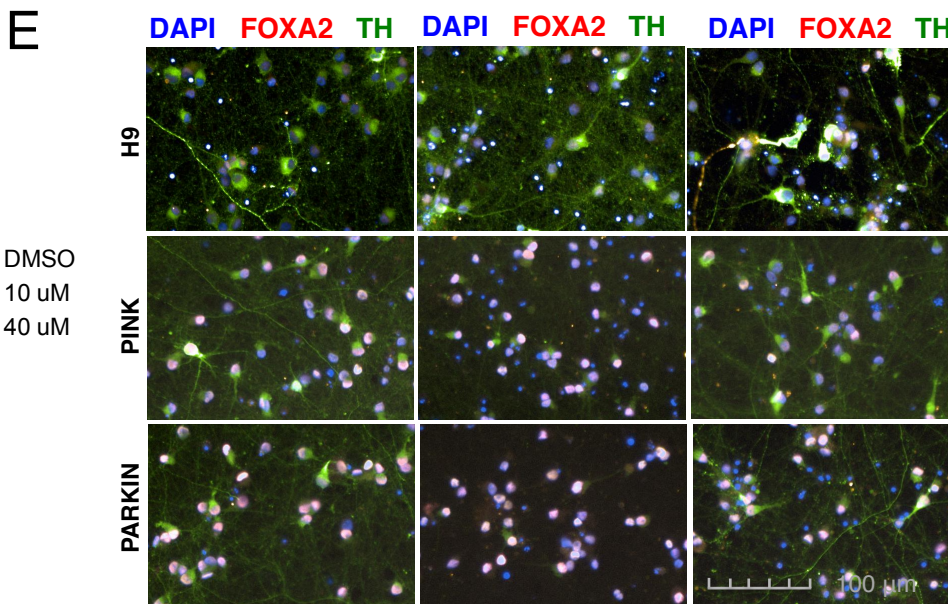

Supplement: NIHMS822121-supplement-6.pdf [file NIHMS822121-supplement-6.pdf]
